# Supplementary material for: Occupational risks associated with severe COVID-19 disease and SARS-CoV-2 infection – a Swedish national case-control study conducted from October 2020 to December 2021
Source: PubMed Central journal article supplement (PMC10789521; doi:10.5271/sjweh.4103), 2023-09-01
Supplement: SJWEH-49-386-S001.pdf [file SJWEH-49-386-S001.pdf]

## Occupational risks associated with severe COVID-19 disease and SARS-CoV-2 infection – a Swedish national case-control study conducted from October 2020 to December 2021<sup>1</sup>

by Kjell Torén, MD,<sup>2</sup> Maria Albin, MD, Tomas Bergström, MD, Nicola Murgia, MD, Magnus Alderling, PhD, Linus Schiöler, PhD, Maria Åberg, MD

1. Supplementary Material
2. Correspondence to: Kjell Torén, School of Public Health and Community Medicine, The Sahlgrenska Academy, University of Gothenburg, Box 414, SE-405 30 Gothenburg, Sweden. [E-mail: Kjell.Toren@amm.gu.se].

**Table S1. List of included principal diagnoses among cases with severe COVID-19 (U07.1 or U07.2) as a principal diagnosis in the National Patient Register.**

| Included categories                                                       | ICD-code         |
|---------------------------------------------------------------------------|------------------|
| <b>Symptom</b>                                                            |                  |
| Cough                                                                     | R05              |
| Abnormalities of breathing                                                | R06              |
| Other symptoms or signs involving the circulatory and respiratory systems | R09              |
| Dizziness and giddiness                                                   | R42              |
| Unknown fever                                                             | R50              |
| Headache                                                                  | R51              |
| Malaise and fatigue                                                       | R53              |
| Syncope and collapse                                                      | R55              |
| <b>Respiratory tract infections</b>                                       |                  |
| Influenza                                                                 | J10              |
| Viral and bacterial pneumonias                                            | J12-J13, J15-J18 |
| Unspecified acute lower respiratory infection                             | J22              |
| Coronavirus infection, unspecified                                        | B34.2, B97.2     |
| Other viral infections                                                    | B34.8 - B34.9    |
| Other and unspecified infectious diseases                                 | B99              |
| <b>Respiratory disorders</b>                                              |                  |
| Pulmonary embolism                                                        | I26              |
| Acute respiratory distress syndrome                                       | J80              |

|                                                        |         |
|--------------------------------------------------------|---------|
| Pulmonary edema                                        | J81     |
| Pleural effusion, not elsewhere classified             | J90     |
| Respiratory failure, not elsewhere classified          | J96     |
| Respiratory disorders in diseases classified elsewhere | J99     |
| <b>Obstructive airway diseases</b>                     |         |
| Acute bronchitis                                       | J20     |
| Acute bronchiolitis                                    | J21     |
| Chronic obstructive pulmonary disease                  | J44     |
| Asthma                                                 | J45     |
| <b>Cardiac diseases</b>                                |         |
| Viral carditis                                         | B33.2   |
| Acute pericarditis                                     | I30     |
| Pericarditis in diseases classified elsewhere          | I32     |
| Chronic ischemic heart disease                         | I25     |
| Myocarditis                                            | I40-I41 |
| Atrial fibrillation and flutter                        | I48     |
| Heart failure                                          | I50     |
| Abnormalities of heart beat                            | R00     |
| <b>Electrolyte disorders</b>                           |         |
| Other disorders of fluid, electrolyte and acid-balance | E87     |
|                                                        |         |
|                                                        |         |

**Table S2. Conditional logistic multivariable regression models of SARS-CoV-2 infection among men and women in relation to the different dimensions of transmission and mitigation factors. Models are matched for age, gender and region.**

| Dimensions of transmission and mitigation factors                                    | SARS-CoV-2 infection<br>N= 561 582 |                  |
|--------------------------------------------------------------------------------------|------------------------------------|------------------|
|                                                                                      | Men N=273 957                      | Women N=287 265  |
|                                                                                      | OR (95% CI)                        | OR (95% CI)      |
| <b>Number of workers in close proximity to each other</b>                            |                                    |                  |
| <10 per day                                                                          | 1.01 (1.00–1.02)                   | 1.00 (0.98–1.01) |
| 10–30 per day                                                                        | 1.13 (1.12–1.15)                   | 1.27 (1.26–1.29) |
| >30 per day                                                                          | 1.30 (1.28–1.32)                   | 1.40 (1.39–1.42) |
| <b>Nature of contacts</b>                                                            |                                    |                  |
| In workspaces with coworkers only                                                    | 1.04 (1.03–1.05)                   | 1.09 (1.08–1.11) |
| In workspaces with the general public                                                | 1.16 (1.14–1.17)                   | 1.27 (1.25–1.28) |
| Regular contacts with infected patients                                              | 1.35 (1.32–1.37)                   | 1.40 (1.38–1.41) |
| <b>Contaminated workspaces</b>                                                       |                                    |                  |
| Frequently sharing materials/surfaces with coworkers ( $\geq 10$ times/day)          | 1.04 (1.03–1.05)                   | 1.16 (1.14–1.17) |
| Sometimes sharing materials/surfaces with the general public (<10 times/day)         | 1.03 (1.00–1.06)                   | 1.01 (0.99–1.03) |
| Frequently sharing materials/surfaces with the general public ( $\geq 10$ times/day) | 1.23 (1.21–1.24)                   | 1.33 (1.31–1.34) |
| <b>Location</b>                                                                      |                                    |                  |
| Mostly working outside                                                               | 0.82 (0.79–0.85)                   | 0.75 (0.70–0.81) |
| Working partly inside                                                                | 1.02 (1.00–1.03)                   | 0.93 (0.90–0.96) |
| Working mostly inside                                                                | 1.12 (1.11–1.13)                   | 1.27 (1.26–1.28) |
| <b>Social distancing</b>                                                             |                                    |                  |
| Always maintained                                                                    | 1.02 (1.01–1.04)                   | 1.15 (1.14–1.17) |
| Not always                                                                           | 1.10 (1.09–1.12)                   | 1.28 (1.26–1.30) |
| Never maintained                                                                     | 1.27 (1.25–1.29)                   | 1.34 (1.33–1.36) |
| <b>Physical proximity</b>                                                            |                                    |                  |
| 3 <sup>rd</sup> vs. 2 <sup>nd</sup> and 1 <sup>st</sup>                              | 1.10 (1.09–1.11)                   | 1.18 (1.17–1.19) |
| 4 <sup>th</sup> vs. 2 <sup>nd</sup> and 1 <sup>st</sup>                              | 1.34 (1.32–1.36)                   | 1.44 (1.42–1.45) |

| <b>Exposure to diseases or infections</b> |                  |                  |
|-------------------------------------------|------------------|------------------|
| 2 <sup>nd</sup> vs. 1 <sup>st</sup>       | 1.08 (1.07–1.10) | 1.17 (1.15–1.18) |
| 3 <sup>rd</sup> vs. 1 <sup>st</sup>       | 1.47 (1.45–1.50) | 1.42 (1.40–1.43) |
| 4 <sup>th</sup> vs. 1 <sup>st</sup>       | 1.48 (1.44–1.52) | 1.43 (1.41–1.45) |

**Table S3. Odds ratios (ORs) for SARS-CoV-2 infection in occupations with >500 cases. ORs are shown with 95% confidence intervals (CI) relative to occupations with low exposure among the 20 occupations with the lowest OR values.**

| <b>Occupation</b>                        | <b>ISCO 2008 No</b> | <b>Cases (N)</b> | <b>OR<sup>a</sup></b> | <b>95% CI</b> |
|------------------------------------------|---------------------|------------------|-----------------------|---------------|
| Livestock and dairy producers            | 6121                | 955              | 0.62                  | 0.58-0.67     |
| University teachers                      | 2310                | 2 479            | 0.62                  | 0.58-0.67     |
| Mixed crop and animal producers          | 6130                | 631              | 0.66                  | 0.61-0.72     |
| Librarians                               | 2622                | 609              | 0.73                  | 0.67-0.79     |
| Gardeners                                | 6113                | 1 735            | 0.76                  | 0.73-0.80     |
| Electronics engineer                     | 2152                | 2 741            | 0.81                  | 0.77-0.84     |
| Chemical science technicians             | 3111                | 865              | 0.81                  | 0.75-0.87     |
| Heavy truck and lorry drivers            | 8332                | 5 199            | 0.82                  | 0.79-0.84     |
| Earth moving and related plant operators | 8342                | 1 936            | 0.86                  | 0.82-0.91     |
| Wood processing plant operators          | 8172                | 704              | 0.87                  | 0.81-0.95     |
| Mechanical engineers                     | 2144                | 1 705            | 0.89                  | 0.84-0.93     |
| Pulp and paper mill process workers      | 8171                | 809              | 0.90                  | 0.84-0.97     |
| Building construction laborer            | 9313                | 832              | 0.90                  | 0.84-0.98     |
| Garbage and recycling collectors         | 9611                | 941              | 0.93                  | 0.86-0.99     |
| Electrical engineers technicians         | 3113                | 605              | 0.93                  | 0.89-0.97     |
| Policy administration professionals      | 2422                | 5 877            | 0.94                  | 0.91-0.97     |
| Domestic cleaners                        | 9111                | 9 310            | 0.94                  | 0.92-0.96     |
| Armed forces (civilian occupations)      | 0310                | 668              | 0.95                  | 0.87-1.03     |
| Engineering professionals NEC            | 2149                | 2 474            | 0.95                  | 0.91-0.99     |
| Civil engineers                          | 2142                | 1 489            | 0.95                  | 0.90-1.00     |

<sup>a</sup>Models are matched for gender, age, and region.

**Table S4. Odds ratios (ORs) for severe COVID-19 disease in all occupations with  $\geq 25$  cases in either men or women. ORs are shown with 95% confidence intervals (CI) relative to occupations with low exposure.**

| Occupation                                   | ISCO 2008 No | Men       |                 |           | Women     |                 |           |
|----------------------------------------------|--------------|-----------|-----------------|-----------|-----------|-----------------|-----------|
|                                              |              | Cases (N) | OR <sup>a</sup> | 95% CI    | Cases (N) | OR <sup>a</sup> | 95% CI    |
| Bus and tram drivers                         | 8331         | 92        | 2.04            | 1.49-2.79 | N.a.      | N.a.            | N.a.      |
| Security guards                              | 5414         | 28        | 1.84            | 1.14-2.96 | N.a.      | N.a.            | N.a.      |
| Nursing professionals                        | 2221         | N.a.      | N.a.            | N.a.      | 104       | 1.81            | 1.37–2.39 |
| Elementary workers, not elsewhere classified | 9629         | 66        | 1.57            | 1.09-2.24 | 31        | 1.36            | 0.83–2.24 |
| Kitchen helpers                              | 9412         | 68        | 1.56            | 1.08-2.24 | 49        | 0.99            | 0.67–1.45 |
| Primary school teachers                      | 2341         | 62        | 1.51            | 1.09-2.11 | 115       | 1.74            | 1.33–2.28 |
| Early childhood educators                    | 2342         | N.a.      | N.a.            | N.a.      | 95        | 1.84            | 1.38–2.45 |
| Childcare workers                            | 5311         | N.a.      | N.a.            | N.a.      | 148       | 1.67            | 1.28–2.18 |
| Food machine operators                       | 8160         | 25        | 1.49            | 0.89-2.50 | N.a.      | N.a.            | N.a.      |
| Mining supervisors                           | 3121         | 34        | 1.44            | 0.95-2.18 | N.a.      | N.a.            | N.a.      |
| Shopkeepers                                  | 5221         | 29        | 1.32            | 0.82-2.13 | N.a.      | N.a.            | N.a.      |
| Teachers' aides                              | 5312         | 27        | 1.32            | 0.79-2.19 | 44        | 1.67            | 1.11–2.51 |
| Taxi drivers                                 | 8322         | 66        | 1.23            | 0.87-1.72 | N.a.      | N.a.            | N.a.      |
| Home-based personal care workers             | 5322         | 75        | 1.22            | 0.89-1.67 | 153       | 1.26            | 0.96–1.64 |
| Certified specialist physicians              | 2211         | 42        | 1.21            | 0.82-1.79 | 34        | 2.05            | 1.31–3.21 |
| Health care assistants                       | 5321         | 86        | 1.21            | 0.91-1.62 | 399       | 1.65            | 1.33–2.05 |
| Metalworking tool setters                    | 7223         | 71        | 1.10            | 0.81-1.48 | N.a.      | N.a.            | 0.82–1.43 |
| Motor vehicle mechanics                      | 7231         | 51        | 1.09            | 0.77-1.54 | N.a.      | N.a.            | 0.78–1.52 |
| Building caretakers                          | 5153         | 80        | 1.07            | 0.72-1.57 | N.a.      | N.a.            | 0.74–1.27 |
| Cooks                                        | 5120         | 44        | 1.07            | 0.72-1.57 | 30        | 1.23            | 0.79–1.94 |
| Agricultural machinery mechanics             | 7233         | 40        | 1.07            | 0.73-1.56 | N.a.      | N.a.            | N.a.      |

|                                                    |      |      |      |           |      |      |           |
|----------------------------------------------------|------|------|------|-----------|------|------|-----------|
| Policy administration officials                    | 2422 | 30   | 1.03 | 0.69-1.55 | 40   | 1.29 | 0.88–1.89 |
| Heavy truck and lorry drivers                      | 8332 | 87   | 0.98 | 0.75-1.29 | N.a. | N.a. | 0.72–1.22 |
| Plumbers                                           | 7126 | 47   | 0.96 | 0.68-1.35 | N.a. | N.a. | N.a.      |
| Shop sales assistants                              | 5223 | 78   | 0.96 | 0.72-1.27 | 92   | 1.08 | 0.81–1.44 |
| Domestic cleaners                                  | 9111 | 53   | 0.96 | 0.67-1.38 | 101  | 0.90 | 0.66–1.22 |
| Painters                                           | 7131 | 25   | 0.95 | 0.59-1.52 | N.a. | N.a. | N.a.      |
| Production clerks                                  | 4322 | 98   | 0.89 | 0.68-1.16 | N.a. | N.a. | 0.60–0.98 |
| Social work and counselling professionals          | 2635 | N.a. | N.a. | N.a.      | 30   | 1.08 | 0.69-1.67 |
| Data entry clerks                                  | 4132 | N.a. | N.a. | N.a.      | 62   | 1.31 | 0.94-1.82 |
| Engineering professionals not elsewhere classified | 2149 | N.a. | N.a. | N.a.      | 25   | 0.99 | 0.63-1.56 |
| Electrical engineering technicians                 | 3113 | 32   | 0.85 | 0.57-1.28 | N.a. | N.a. | N.a.      |
| Electricians                                       | 7411 | 29   | 0.85 | 0.56-1.29 | N.a. | N.a. | N.a.      |
| Assemblers not elsewhere classified                | 8219 | 25   | 0.76 | 0.48-1.21 | N.a. | N.a. | N.a.      |
| House builders                                     | 7111 | 47   | 0.69 | 0.49-0.97 | N.a. | N.a. | N.a.      |

<sup>a</sup>Models are matched for age, gender, and region, and further adjusted for education, country of birth, dwelling area/inhabitants, number of inhabitants in the dwelling, chronic obstructive pulmonary disease, ischemic heart disease, diabetes, and dispensed corticosteroids.

**Table S5. Odds ratios (ORs) for SARS-CoV-2 infection among men in occupations with >250 cases. ORs are shown with 95% confidence intervals (CI) relative to occupations with low exposure among the 20 occupations with the highest OR values and the 20 occupations with the lowest OR values.**

| Occupation                                               | ISCO 2008 No | Cases (N) | OR <sup>a</sup> | 95% CI    |
|----------------------------------------------------------|--------------|-----------|-----------------|-----------|
| <b>The twenty occupations with the highest OR values</b> |              |           |                 |           |
| Athletes and sports player                               | 3421         | 407       | 3.14            | 2.75-3.58 |
| Prison guards                                            | 5413         | 952       | 1.83            | 1.70–1.98 |
| Social work professionals                                | 3412         | 1 543     | 1.81            | 1.70–1.92 |
| Driving instructors                                      | 5165         | 306       | 1.75            | 1.53-2.00 |
| Primary school teachers                                  | 2341         | 4 924     | 1.73            | 1.67–1.79 |
| Early childhood educators                                | 2342         | 1 449     | 1.72            | 1.61–1.83 |
| Firefighters                                             | 5411         | 892       | 1.69            | 1.56–1.83 |
| Nursing professionals                                    | 2221         | 1 709     | 1.65            | 1.56–1.75 |
| Health services managers                                 | 1342         | 563       | 1.64            | 1.49–1.80 |
| Police officers                                          | 5412         | 1 701     | 1.62            | 1.53–1.71 |
| Physiotherapists                                         | 2264         | 438       | 1.61            | 1.45-1.80 |
| Sports coaches, instructors and officials                | 3422         | 873       | 1.58            | 1.46-1.71 |
| Metal production process controllers                     | 3135         | 281       | 1.57            | 1.37-1.80 |
| Teachers' aides                                          | 5312         | 2 784     | 1.56            | 1.49–1.64 |
| Certified specialist physician                           | 2211         | 2 638     | 1.53            | 1.46-1.60 |
| Restaurant managers                                      | 1412         | 809       | 1.50            | 1.38-1.63 |
| Financial and insurance services branch managers         | 1346         | 420       | 1.49            | 1.34-1.67 |
| Education managers (head teachers)                       | 1345         | 541       | 1.49            | 1.35-1.64 |
| Healthcare assistants                                    | 5321         | 6 352     | 1.49            | 1.44–1.53 |
| Hair dressers                                            | 5141         | 440       | 1.47            | 1.32-1.64 |
|                                                          |              |           |                 |           |
| <b>The twenty occupations with the lowest OR values</b>  |              |           |                 |           |
| Forestry workers                                         | 6210         | 323       | 0.56            | 0.50-0.63 |
| Livestock and dairy producers                            | 6121         | 571       | 0.58            | 0.53-0.63 |
| University teachers                                      | 2310         | 1 258     | 0.61            | 0.58-0.65 |
| Messengers, deliverers and luggage porters               | 9621         | 368       | 0.61            | 0.55-0.69 |
| Field crop and vegetable growers                         | 6111         | 336       | 0.62            | 0.55-0.70 |
| Mobile farm and forestry workers                         | 8341         | 470       | 0.63            | 0.57-0.69 |
| Mixed crop and animal producers                          | 6130         | 495       | 0.68            | 0.62-0.75 |
| Gardeners                                                | 6113         | 1 226     | 0.75            | 0.71-0.80 |
| Chemical science technicians                             | 3111         | 415       | 0.79            | 0.71-0.88 |
| Mixed crop and livestock farm labourers                  | 9213         | 264       | 0.80            | 0.70-0.91 |
| Heavy truck and lorry drivers                            | 8332         | 4 821     | 0.81            | 0.79-0.84 |
|                                                          | 2152         | 2 315     | 0.82            | 0.78-0.85 |



|                                              |      |       |      |           |
|----------------------------------------------|------|-------|------|-----------|
| Earth moving and related plant operators     | 8342 | 1 864 | 0.85 | 0.81-0.90 |
| Wood processing plant operators              | 8172 | 624   | 0.85 | 0.78-0.93 |
| Domestic cleaners                            | 9111 | 2 330 | 0.88 | 0.84-0.92 |
| Packing and labelling machine operators      | 8183 | 312   | 0.88 | 0.78-0.99 |
| Building construction laborer                | 9313 | 789   | 0.89 | 0.83-0.97 |
| Mechanical engineers                         | 2144 | 1 291 | 0.90 | 0.84-0.95 |
| Elementary workers, not elsewhere classified | 9629 | 1 700 | 0.90 | 0.85-0.95 |
| Pulp and paper mill process workers          | 8171 | 687   | 0.90 | 0.83-0.98 |
| Garbage and recycling collectors             | 9611 | 829   | 0.92 | 0.85-0.99 |
| Electrical engineers technicians             | 3113 | 2 539 | 0.94 | 0.90-0.99 |
| Contact center informations clerks           | 4222 | 1 544 | 0.94 | 0.91-0.97 |
| Armed forces (civilian occupations)          | 0310 | 600   | 0.94 | 0.86-1.03 |
| Locomotive engine drivers                    | 8311 | 386   | 0.95 | 0.85-1.06 |
| Electrical line installers and repairers     | 7413 | 311   | 0.95 | 0.84-1.08 |

<sup>a</sup>Models are matched for age and region.

**Table S6. Odds ratios (ORs) for SARS-CoV-2 infection among women in occupations with >250 cases. ORs are shown with 95% confidence intervals (CI) relative to occupations with low exposure among the 20 occupations with the highest OR values and with the lowest OR values.**

| <b>Occupation</b>                                        | <b>ISCO 2008 No</b> | <b>Cases (N)</b> | <b>OR<sup>a</sup></b> | <b>95% CI</b> |
|----------------------------------------------------------|---------------------|------------------|-----------------------|---------------|
| <b>The twenty occupations with the highest OR values</b> |                     |                  |                       |               |
| Early childhood educators                                | 2342                | 12 738           | 1.69                  | 1.65–1.73     |
| Primary school teachers                                  | 2341                | 13 395           | 1.65                  | 1.61–1.69     |
| Teacher’s aides                                          | 5312                | 4 332            | 1.61                  | 1.55-1.67     |
| Child care services managers                             | 1341                | 611              | 1.61                  | 1.47-1.77     |
| Child care workers                                       | 5311                | 14 857           | 1.61                  | 1.57-1.65     |
| Midwives                                                 | 2222                | 836              | 1.60                  | 1.47-1.73     |
| Pharmaceutical technicians                               | 3213                | 542              | 1.55                  | 1.41-1.71     |
| Nursing professionals                                    | 2221                | 12 065           | 1.55                  | 1.51–1.59     |
| Healthcare assistants                                    | 5321                | 33 534           | 1.55                  | 1.52–1.58     |
| Education methods specialists                            | 2351                | 1 640            | 1.54                  | 1.46-1.63     |
| Service managers not elsewhere classified                | 1439                | 363              | 1.53                  | 1.36-1.72     |
| Prison guards                                            | 5413                | 952              | 1.83                  | 1.70–1.98     |
| Social work professionals                                | 3412                | 1 543            | 1.81                  | 1.70–1.92     |
| Health services managers                                 | 1342                | 563              | 1.64                  | 1.49–1.80     |
| Hair dressers                                            | 5141                | 440              | 1.47                  | 1.32-1.64     |
| Dental assistants                                        | 3251                | 1 900            | 1.43                  | 1.36-1.51     |
| Education managers                                       | 1345                | 1 136            | 1.43                  | 1.34-1.53     |
| Agricultural machinery mechanics                         | 7233                | 298              | 1.43                  | 1.26-1.63     |
| Dentists                                                 | 2261                | 539              | 1.42                  | 1.29-1.57     |
| Restaurant managers                                      | 1412                | 492              | 1.38                  | 1.25-1.53     |
|                                                          |                     |                  |                       |               |
| <b>Occupations with the lowest OR values</b>             |                     |                  |                       |               |
| University teachers                                      | 2310                | 1 221            | 0.67                  | 0.63-0.72     |
| Livestock and dairy producers                            | 6121                | 384              | 0.70                  | 0.63-0.78     |
| Electronic engineers                                     | 2152                | 2 315            | 0.77                  | 0.69-0.85     |
| Librarians                                               | 2622                | 489              | 0.77                  | 0.70-0.85     |
| Gardeners                                                | 6113                | 509              | 0.78                  | 0.71-0.86     |
| Heavy truck and lorry drivers                            | 8332                | 378              | 0.79                  | 0.71-0.88     |
| Tax officials                                            | 3352                | 294              | 0.82                  | 0.72-0.92     |
| Electrical engineers technicians                         | 3113                | 359              | 0.82                  | 0.74-0.92     |
| Chemical science technicians                             | 3111                | 450              | 0.83                  | 0.75-0.91     |
| Mechanical engineering technicians                       | 3115                | 552              | 0.84                  | 0.77-0.92     |
| Mechanical engineers                                     | 2144                | 414              | 0.86                  | 0.77-0.95     |

|                                                               |      |       |      |           |
|---------------------------------------------------------------|------|-------|------|-----------|
| Physical and engineering technicians not elsewhere classified | 3119 | 559   | 0.87 | 0.80-0.96 |
| Engineering professionals NEC                                 | 2149 | 734   | 0.91 | 0.84-0.99 |
| Civil engineers                                               | 2142 | 412   | 0.91 | 0.82-1.01 |
| Policy administration professionals                           | 2422 | 3 727 | 0.92 | 0.89-0.95 |
| Architects                                                    | 2161 | 404   | 0.94 | 0.84-1.04 |
| Contact centre sales persons                                  | 5244 | 408   | 0.95 | 0.85-1.05 |
| Governments regulatory professionals not elsewhere classified | 3359 | 1 270 | 0.95 | 0.90-1.01 |

<sup>a</sup>Models are matched for age, and region.

**Fig S1. Visualization of DAG model**
